# Supplementary material for: A Practical Approach to Language Complexity: A Wikipedia Case Study
Source: PLOS journal article supplement (doi:10.1371/journal.pone.0048386), 2012-11-07
Supplement: S2 (10.1371/journal.pone.0048386.s002) [file journal.pone.0048386.s002]

## Text S2: Corpora and analysis tools

To download Wikipedia dumps use the static snapshots from <http://dumps.wikimedia.org>. To download the dynamic content, especially the most updated version of individual articles, use the “MediaWiki API” online platform accessible at [http://www.mediawiki.org/wiki/API:Main\\_page](http://www.mediawiki.org/wiki/API:Main_page). The Brown, Switchboard, and WSJ corpora are distributed by the Linguistic Data Consortium as part of the Penn Treebank, <http://www ldc.upenn.edu/Catalog/catalogEntry.jsp?catalogId=LDC99T42> The POS tagging of these texts, while not necessarily 100% correct, is manually corrected and generally considered a gold standard against which POS taggers are evaluated. Many gigaword corpora (including Arabic, Chinese, English, French, and Spanish) are available from the LDC, see <http://www ldc.upenn.edu/Catalog/catalogSearch.jsp>

To clean the text from Wikimedia tags and external references, we used the WikiExtractor developed at the University of Pisa Multimedia Lab, available at [http://medialab.di.unipi.it/wiki/Wikipedia\\_Extractor](http://medialab.di.unipi.it/wiki/Wikipedia_Extractor). Another system with similar capabilities is “wiki2text” <http://wiki2text.sourceforge.net>. We used faster (flex-based) versions of the original Koehn tokenizer and Mikheev sentence splitter, available at <https://github.com/zseder/webcorpus>.

For English stemming, the standard is the “Porter Stemming Algorithm” <http://tartarus.org/~martin/PorterStemmer>. For other languages a good starting point is [http://aclweb.org/aclwiki/index.php?title=List\\_of\\_resources\\_by\\_language](http://aclweb.org/aclwiki/index.php?title=List_of_resources_by_language).

We calculated the Gunning Fog index using the code and algorithm of Greg Fast <http://cpansearch.perl.org/src/GREGFAST/Lingua-EN-Syllable-0.251/Syllable.pm>. For part-of-speech tagging we used the “HunPOS tagger” <http://code.google.com/p/hunpos/> and the “HunNER NE recognizer”, which are specific applications of the “HunTag tool”, available at <https://github.com/recski/HunTag/>.

To perform the n-gram analysis we used the “N-Gram Extraction Tools” <http://homepages.inf.ed.ac.uk/lzhang10/ngram.html> of Le Zhang.

All the abovementioned code and packages are open source and available publicly under GPL, LGPL, or similar licenses, but some corpora may have copyright restrictions.
